# Supplementary material
Source: PubMed Central journal article supplement (PMC7406299)
Supplement: jciinsight-5-136720-s239.pdf [file jciinsight-5-136720-s239.pdf]

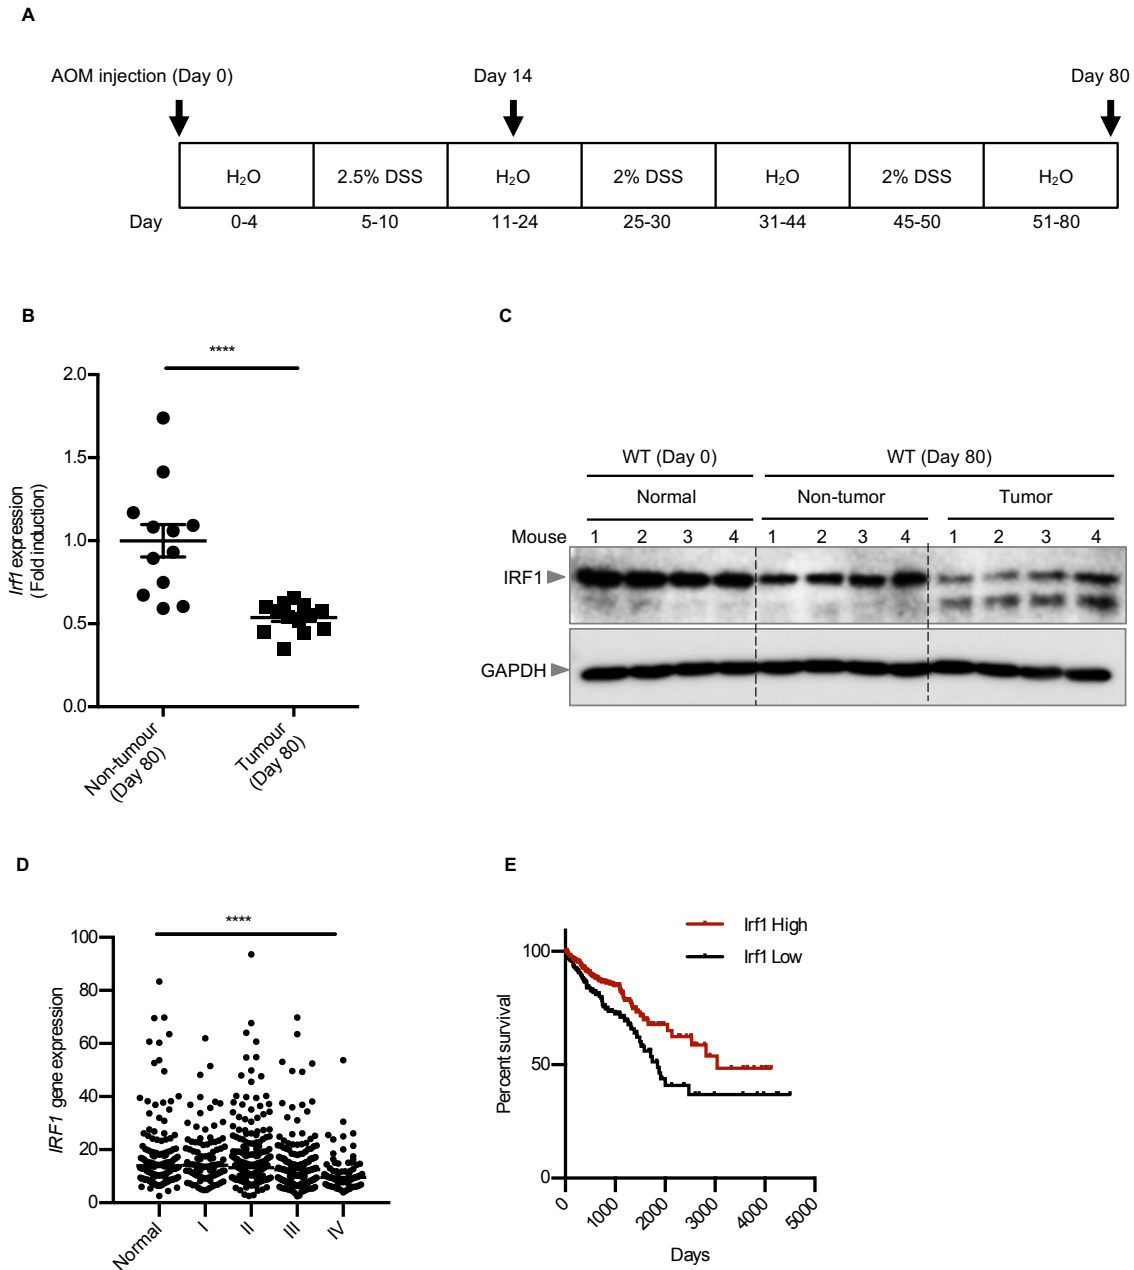

**Supplementary Figure 1. The expression of IRF1 in tumor and non-tumor colon samples**

(A) Timeline for azoxymethane (AOM) and dextran sulfate sodium (DSS) treatment in mice. (B) Relative expression of the gene encoding IRF1 in non-tumor and tumor tissue in the colons of wild type (34) mice 80 days after AOM injection. (C) Immunoblot analysis of IRF1 in the colons of WT mice on day 0 and in tumor and non-tumor tissue on day 80 after AOM injection. Blots represent data from the same biological samples run in parallel. (D) Analysis of data from the

TCGA database for *IRF1* mRNA expression in human CRC samples obtained at different stages of the disease. (E) Kaplan-Meier survival curve of patients with colorectal cancer with high or low *IRF1* gene expression. Patients were classified into either high or low *IRF1* expression using the best expression cutoff criterion described in the Human Protein Atlas (58, 59). Each symbol represents an individual mouse in B and an individual clinical isolate in D. Data are from one experiment representative of three independent experiments in B and C. \*\*\*\* $P < 0.0001$ . The two-tailed t-test (B), one-way ANOVA (D), and log-rank (Mantel-Cox) test (E) were used. Data are represented as mean  $\pm$  SEM in B and D.

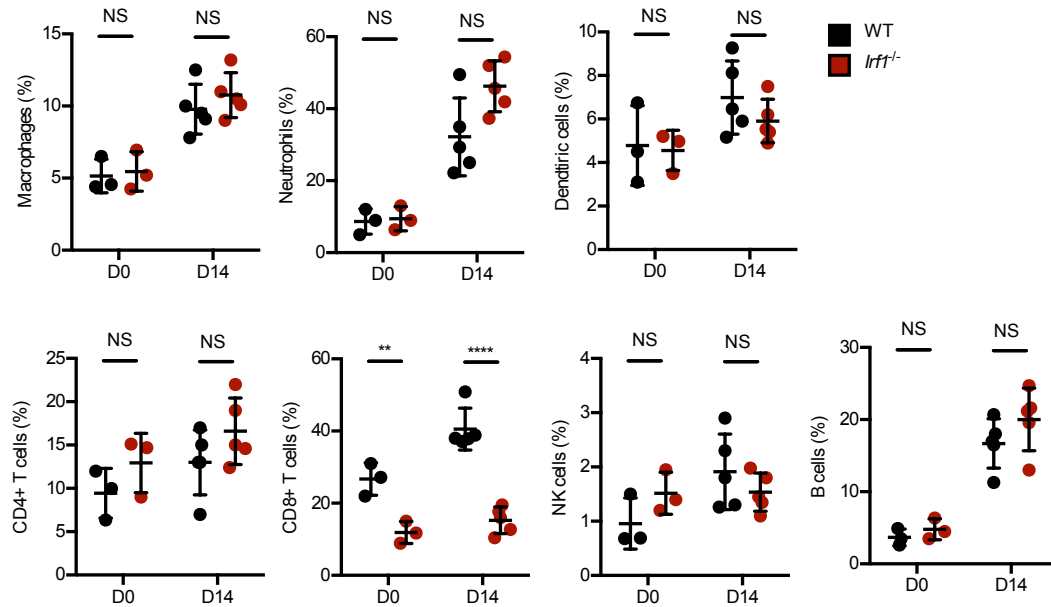

### Supplementary Figure 2. Role of IRF1 in infiltrating immune cells during colitis

The percentages of macrophages, neutrophils, dendritic cells, NK cells, CD8<sup>+</sup> T cells, and CD4<sup>+</sup> T cells per colon in WT and *Irf1*<sup>-/-</sup> mice 14 days after injection of azoxymethane (AOM). \*\* $P < 0.01$  \*\*\*\* $P < 0.0001$ ; NS, not statistically significant. The two-way ANOVA was used. Data are represented as mean  $\pm$  SEM.

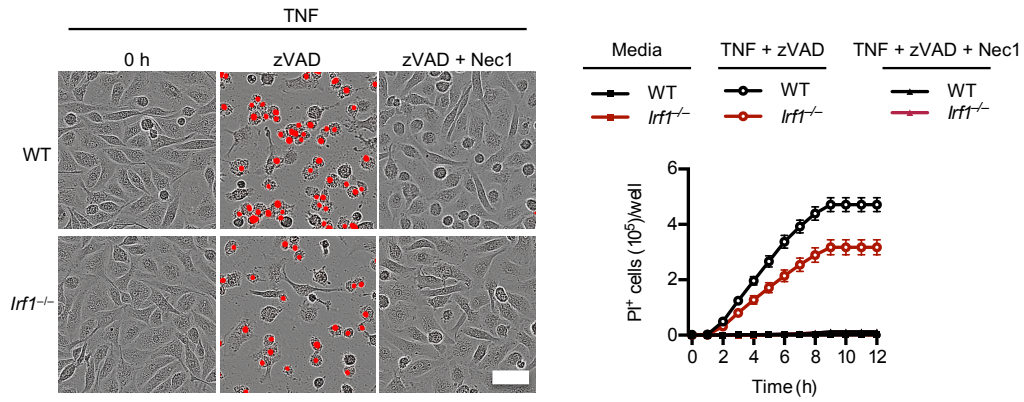

### Supplementary Figure 3. IRF1 promotes necroptosis.

Real-time cell death analysis by IncuCyte and propidium iodide (PI) staining in bone marrow-derived macrophages (BMDMs) after stimulation with TNF, TNF + zVAD, or TNF + zVAD + Nec1 (TNF 50 ng/mL; zVAD 25  $\mu$ M; Nec1 25  $\mu$ M) for 0 or 6 h. Scale bar, 500  $\mu$ M. Data are from one experiment representative of two independent experiments. Data are represented as mean  $\pm$  SEM.

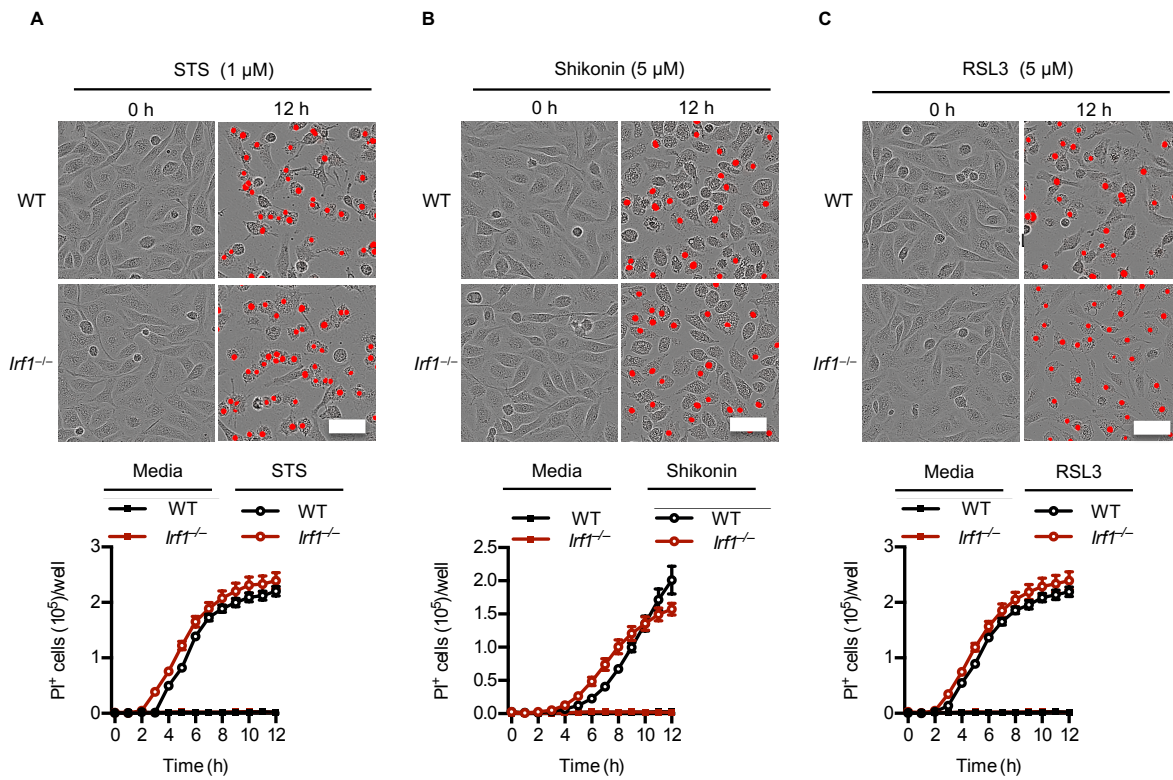

**Supplementary Figure 4. IRF1 is dispensable for cell death in response to classical cell death inducers.**

(A–C) Real-time cell death analysis by IncuCyte and propidium iodide (PI) staining in bone marrow-derived macrophages (BMDMs) after stimulation with staurosporine (STS; 1  $\mu$ M) for 12 h (A), shikonin (5  $\mu$ M) for 12 h (B), or RSL3 (5  $\mu$ M) for 12 h (C). Scale bar, 500  $\mu$ M. Data are from one experiment representative of two independent experiments. Data are represented as mean  $\pm$  SEM.

## SUPPLEMENTARY TABLE

Supplementary Table 1. Real-time qPCR primer sequences

| Target       | Primer sequence                                                                                      |
|--------------|------------------------------------------------------------------------------------------------------|
| <i>mIrf1</i> | Forward: 5'-GTG AAC TAC TGG GCT TTC-3'<br>Reverse: 5'-CTG GGA TTT GGT TGG AAT T-3'                   |
| <i>mHprt</i> | Forward: 5'-CTC ATG GAC TGA TTA TGG ACA GGA C-3'<br>Reverse: 5'-GCA GGT CAG CAA AGA ACT TAT AGC C-3' |
